# Supplementary material for: Neutral Aun (n = 3–10) clusters catalyze acetylene hydrochlorination: a density functional theory study
Source: Royal Society of Chemistry journal article supplement (doi:10.1039/c4ra05463f), 2014-01-01
Supplement: c4ra05463f1.pdf [file c4ra05463f1.pdf]

# Neutral $\text{Au}_n$ ( $n=3-10$ ) Cluster Catalyzes Acetylene Hydrochlorination: A Density Functional Theory Study

Yang Wang, Mingyuan Zhu, Lihua Kang\*, Bin Dai\*

College of Chemistry and Chemical Engineering/ Key Laboratory for Green  
Processing of Chemical Engineering of Xinjiang Bingtuan. Shihezi University,  
Shihezi, Xinjiang, 832000, PR China

## 1 Structural and electronic properties of gold clusters

Reports on the geometrical configurations of different Au clusters are extensive<sup>1-6</sup>. Regarding the optimal configuration of the  $\text{Au}_{3-10}$  cluster, numerous researchers concur on a planar structure, and the geometries in our paper are the same with their conclusions (Fig. S1). The most stable configuration of the  $\text{Au}_9$  cluster in literature<sup>1,3,4</sup> was considered to be isosceles trapezoid. However, D. Xia et al.<sup>6</sup> argued that the arrow-shaped configuration is the most stable. We performed optimization calculations on the two configurations, and we also found that the most stable

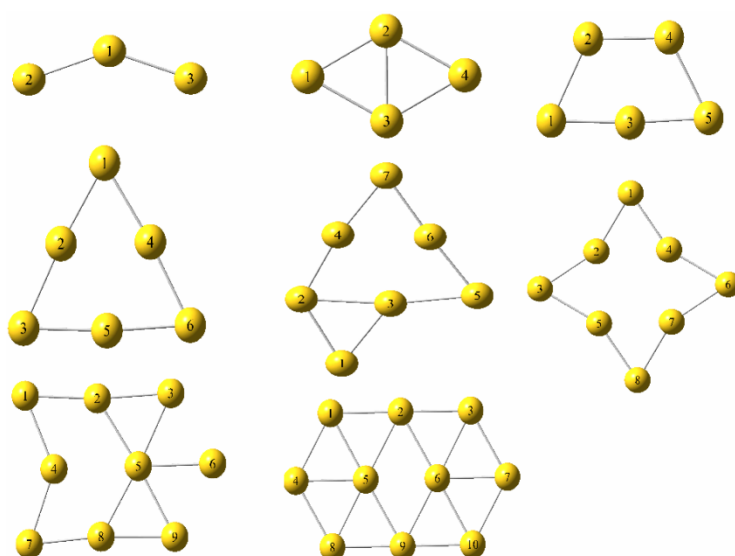

Fig. S1. Optimized geometries of the most stable neutral  $\text{Au}_n$  clusters ( $n=3-10$ ).

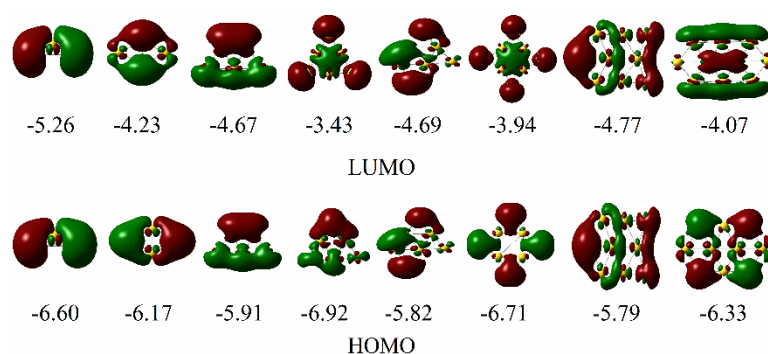

Fig. S2. Frontier molecular orbitals and corresponding orbital energies of the neutral  $\text{Au}_n$  clusters ( $n=3-10$ ) calculated at the B3LYP/LANL2DZ level of theory. (energies in eV, isovalue = 0.02)

configuration of the  $\text{Au}_9$  cluster is the arrow-shaped configuration. The FMO and corresponding orbital energies of the neutral  $\text{Au}_n$  clusters ( $n=3-10$ ) were calculated and shown in Fig. S2. We then calculated the energy gaps of HOMO–LUMO ( $\text{Au}_n \rightarrow \text{C}_2\text{H}_2/\text{HCl}$ ) and HOMO–LUMO ( $\text{C}_2\text{H}_2/\text{HCl} \rightarrow \text{Au}_n$ ) in Table S1. The energy gaps of HOMO–LUMO ( $\text{HCl} \rightarrow \text{Au}_n$ ) are smaller than those of HOMO–LUMO ( $\text{Au}_n \rightarrow \text{HCl}$ ), and those of  $\text{C}_2\text{H}_2$  are the same with those of  $\text{HCl}$ . These results indicate that both  $\text{HCl}$  and  $\text{C}_2\text{H}_2$  are electron donors and the  $\text{Au}_n$  clusters are electron acceptors: the electrons transfer from the HOMO of  $\text{HCl}$  and  $\text{C}_2\text{H}_2$  to the LUMO of  $\text{Au}_n$  clusters. Therefore, we can preliminarily predict the distribution of reaction sites from the LUMO of the  $\text{Au}_n$  clusters in Fig. S2. We can derive the following information: 1) two different types of active sites exist, namely, top sites ( $\text{Au}_3$ ,  $\text{Au}_4$ ,  $\text{Au}_6$ ,  $\text{Au}_7$ ,  $\text{Au}_8$ ,  $\text{Au}_9$ ) and bridge sites ( $\text{Au}_5$ ,  $\text{Au}_7$ ,  $\text{Au}_9$ ,  $\text{Au}_{10}$ ). 2) a high similarity in distribution of reaction sites exists between  $\text{Au}_6$  and  $\text{Au}_8$ ,  $\text{Au}_5$  and  $\text{Au}_{10}$ . We believe that apart from the size of gold clusters, different types of active sites can affect the catalytic activity

performance. In Fig. S3, we compared the energy gaps of HOMO–LUMO ( $\text{HCl} \rightarrow \text{Au}_n$ ) and HOMO–LUMO ( $\text{C}_2\text{H}_2 \rightarrow \text{Au}_n$ ) and yielded the following two main results: 1) for

Table S1. The orbital energies on LUMO and HOMO of  $\text{C}_2\text{H}_2$ ,  $\text{HCl}$  and  $\text{Au}_n$  cluster, and their different energy gaps between  $\text{C}_2\text{H}_2$ ,  $\text{HCl}$  and  $\text{Au}_n$  cluster. (energies in  $\text{eV}$ , isovalue = 0.02)

|                        | LUMO  | HOMO  | HOMO-LUMO<br>( $\text{HCl} \rightarrow \text{Au}_n$ ) | HOMO-LUMO<br>( $\text{Au}_n \rightarrow \text{HCl}$ ) | HOMO-LUMO<br>( $\text{C}_2\text{H}_2 \rightarrow \text{Au}_n$ ) | HOMO-LUMO<br>( $\text{Au}_n \rightarrow \text{C}_2\text{H}_2$ ) |
|------------------------|-------|-------|-------------------------------------------------------|-------------------------------------------------------|-----------------------------------------------------------------|-----------------------------------------------------------------|
| $\text{HCl}$           | -0.81 | -9.19 |                                                       |                                                       |                                                                 |                                                                 |
| $\text{C}_2\text{H}_2$ | 0.11  | -8.08 |                                                       |                                                       |                                                                 |                                                                 |
| $\text{Au}_3$          | -5.26 | -6.60 | 3.93                                                  | 5.78                                                  | 2.82                                                            | 6.70                                                            |
| $\text{Au}_4$          | -4.23 | -6.17 | 4.96                                                  | 5.35                                                  | 3.85                                                            | 6.27                                                            |
| $\text{Au}_5$          | -4.67 | -5.91 | 4.53                                                  | 5.10                                                  | 3.42                                                            | 6.02                                                            |
| $\text{Au}_6$          | -3.43 | -6.92 | 5.76                                                  | 6.10                                                  | 4.65                                                            | 7.02                                                            |
| $\text{Au}_7$          | -4.69 | -5.82 | 4.50                                                  | 5.00                                                  | 3.39                                                            | 5.92                                                            |
| $\text{Au}_8$          | -3.94 | -6.71 | 5.25                                                  | 5.90                                                  | 4.14                                                            | 6.82                                                            |
| $\text{Au}_9$          | -4.77 | -5.79 | 4.42                                                  | 4.98                                                  | 3.31                                                            | 5.90                                                            |
| $\text{Au}_{10}$       | -4.07 | -6.33 | 5.13                                                  | 5.52                                                  | 4.02                                                            | 6.44                                                            |

both  $\text{HCl}$  and  $\text{C}_2\text{H}_2$ , the energy gaps of even-numbered  $\text{Au}_n$  clusters are larger than those on adjacent odd-numbered ones, and 2) overall, the energy gaps of HOMO–LUMO ( $\text{HCl} \rightarrow \text{Au}_n$ ) are larger than those of HOMO–LUMO ( $\text{C}_2\text{H}_2 \rightarrow \text{Au}_n$ ) for even-numbered ones. The energy gaps denote the ability of the electrons to transfer

between HCl/C<sub>2</sub>H<sub>2</sub> and Au<sub>n</sub> clusters. Therefore, we can predict that acetylene adsorption is better on gold clusters than on hydrogen chloride, and this view was confirmed by the subsequent study in this paper.

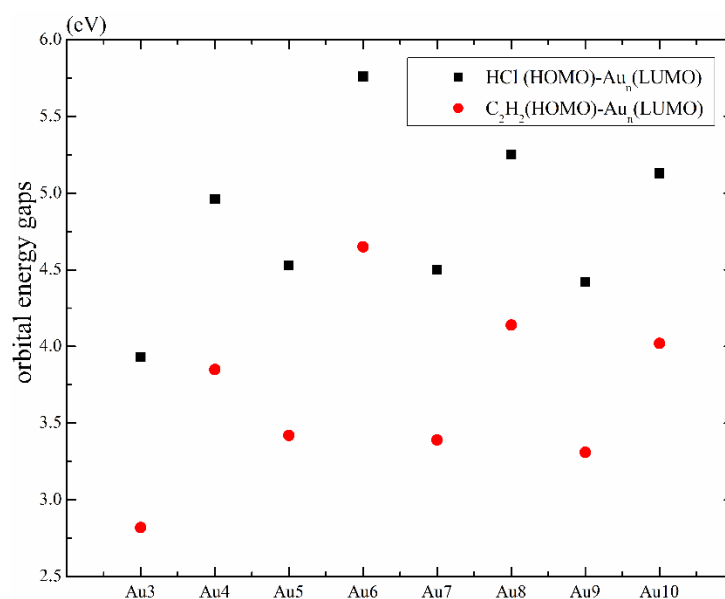

Fig. S3. The orbital energy gaps between HOMO of C<sub>2</sub>H<sub>2</sub>, HCl and LUMO of Au<sub>n</sub> cluster. (energies in eV, isovalue = 0.02)

## 2 Adsorption and activation of C<sub>2</sub>H<sub>2</sub> and HCl on Au<sub>n</sub> (n=3–10) clusters.

By predicting the active sites on the Au<sub>n</sub> clusters in Fig. S2, we built all possible adsorption configurations for HCl and C<sub>2</sub>H<sub>2</sub> and noted the stable adsorption complexes. All complexes with no imaginary frequencies and their corresponding adsorption energies are listed in Fig. S4. The Au<sub>3</sub>, Au<sub>4</sub>, and Au<sub>6</sub> clusters have only one adsorption site, whereas the other clusters have more. The planes between HCl or C<sub>2</sub>H<sub>2</sub> and Au<sub>3–5</sub> clusters are coplanar, whereas the planes of HCl or C<sub>2</sub>H<sub>2</sub> are vertical with the Au<sub>6–10</sub> clusters. In Au<sub>5</sub> complexes, C<sub>2</sub>H<sub>2</sub> is very easily adsorbed to the bridge

site between the Au (2) and Au (4) atoms (the code numbers of Au clusters are shown in Fig. S1), and the adsorption energy reached  $-22.4 \text{ kcal}\cdot\text{mol}^{-1}$ . However,  $\text{C}_2\text{H}_2$  fully occupies the active site; thus, the effective adsorption of HCl in the  $\text{Au}_5$  cluster is difficult. This orientation is not conducive for the reaction of both compounds. Therefore, the best adsorption configuration involves HCl and  $\text{C}_2\text{H}_2$  sharing the

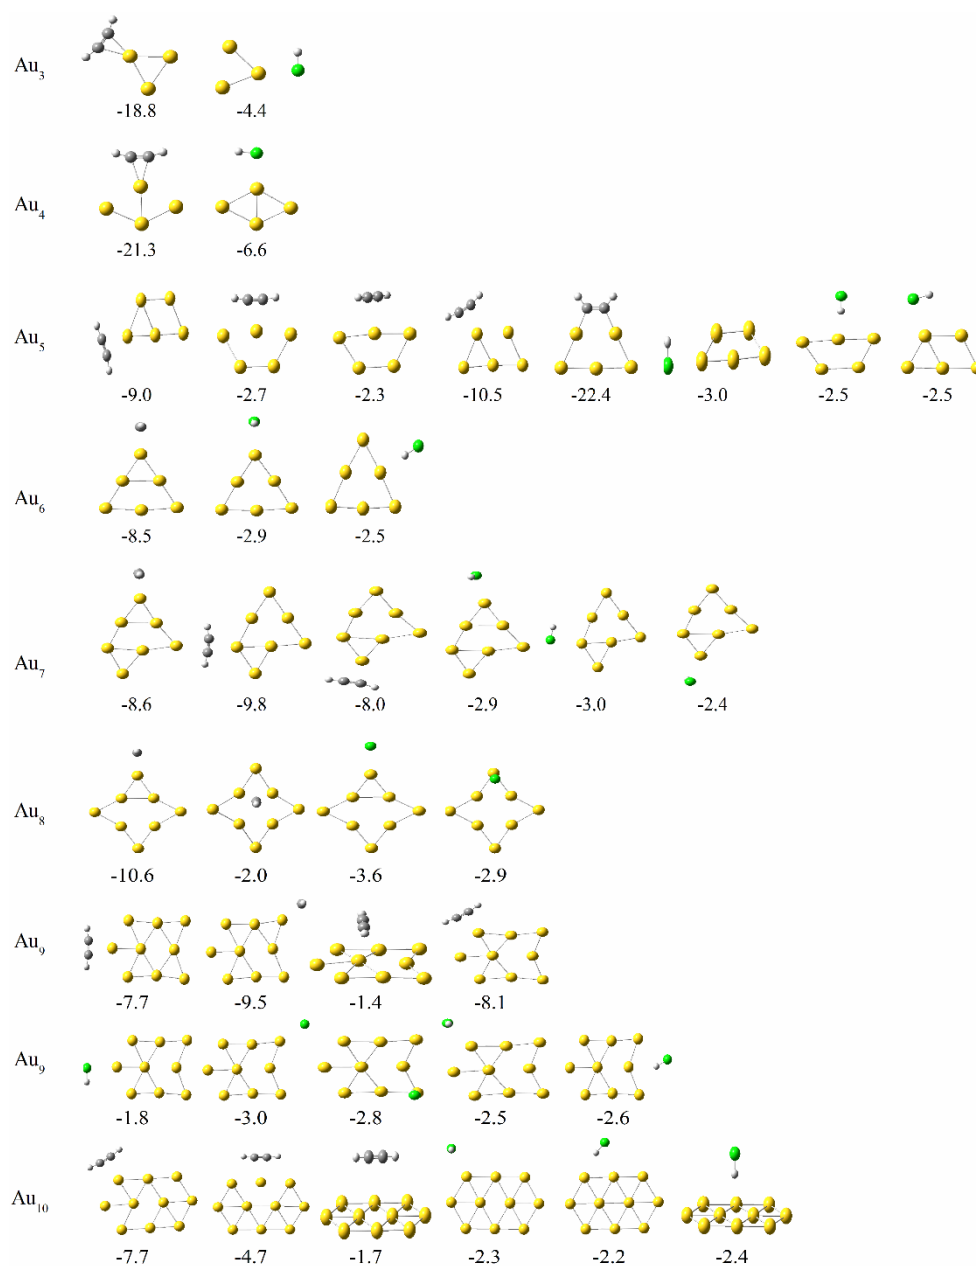

Fig. S4. The adsorption configurations and energies of  $\text{C}_2\text{H}_2$  and HCl on different sites of  $\text{Au}_n$  cluster. (energies in  $\text{kcal}\cdot\text{mol}^{-1}$ )

bridge site together, with  $C_2H_2$  occupying the Au (2) atom and HCl occupying the Au (4) atom.  $C_2H_2$  is conventionally much easier to adsorb on the  $Au_n$  clusters than HCl, which verifies the previous prediction. In Table S2, we show the optimal adsorption energies of  $C_2H_2$  and HCl on the  $Au_n$  clusters, and the chart is shown in Fig. S5. The  $Au_n$  clusters would preferentially adsorb  $C_2H_2$  to form  $Au_n-C_2H_2$  complexes and the complexes adsorb HCl because of the considerable difference in the adsorption energies of  $C_2H_2$  and HCl. Moreover, the adsorption energies of  $C_2H_2$  and HCl tend to

Table S2. The optimal adsorption energies of  $C_2H_2$ , HCl on  $Au_{3-10}$  cluster. (energies in  $\text{kcal}\cdot\text{mol}^{-1}$ )

|          | $Au_3$ | $Au_4$ | $Au_5$ | $Au_6$ | $Au_7$ | $Au_8$ | $Au_9$ | $Au_{10}$ |
|----------|--------|--------|--------|--------|--------|--------|--------|-----------|
| $C_2H_2$ | -18.8  | -21.3  | -10.5  | -8.5   | -9.8   | -10.6  | -7.7   | -7.7      |
| HCl      | -4.4   | -6.6   | -3.0   | -2.9   | -3.0   | -3.6   | -3.0   | -2.4      |

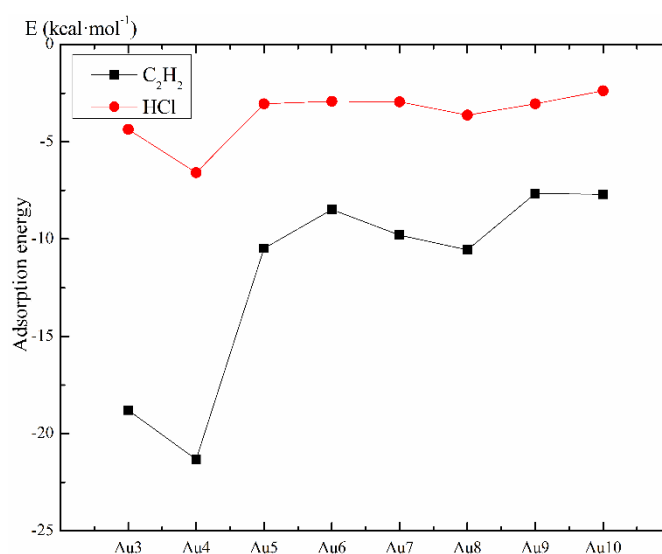

Fig. S5. The adsorption energies of  $C_2H_2$  and HCl on  $Au_{3-10}$  cluster (energies in  $\text{kcal}\cdot\text{mol}^{-1}$ ).

remain constant. Among the  $Au_n$  ( $n=3-10$ ) clusters, the  $Au_4$  cluster shows the highest ability of adsorbing  $C_2H_2$  and HCl. In order to better elucidate the direction of electron transfer between gold clusters and  $C_2H_2$  / HCl in the process of adsorption, we listed the Mulliken partial charges (au) of Au cluster,  $C_2H_2$  and HCl in different adsorbed complexes. In Table S4, the Au cluster is always electron acceptor during adsorbing  $C_2H_2$  and HCl. Both in the  $Au_n-C_2H_2$  and  $Au_n-HCl$  adsorbed complexes, the Au clusters gathered many negative charges. That indicates the electron transfers from the HOMO of  $C_2H_2$  and HCl to the LUMO of  $Au_n$  clusters, and this is consistent with the results of FMO analysis. Besides, Au clusters of  $Au_n-C_2H_2$  adsorbed complexes have more negative charges and that of  $Au_n-HCl$  complexes. Now through the FMO analysis, energy gaps, adsorption energies and charge analysis, we drew a deep conclusion that  $C_2H_2$  is a preferential adsorption on Au clusters.

### **3 Transition states in $Au_3$ cluster catalyzed reaction pathway.**

The acetylene hydrochlorination catalyzed by  $Au_3$  cluster can be achieved through two transition states, and we showed the geometries of transition states (Ts) in Fig. S6. The bond length of transition states involved in the  $Au_3$  cluster catalysis pathways are shown in Table S5. In Ts1, the HCl is cracked by both  $C_2H_2$  and  $Au_3$  cluster. Therefore, the  $C_2H_2$  and HCl are activated simultaneously, and thus this step shows synergistic effect. This activation is significantly strong because the length of H 4–Cl 5 in Ts1 is 1.493 Å (the normal bond length of HCl is just 1.286 Å). In Ts2, the H 4 atom and the chloroethenyl are both adsorbed at the Au 1 site, thereby allowing easy transfer of the H 4 atom from Au 1 to C 8 atom of  $C_2H_2$ ; this can be

inferred from the tiny energy barrier between Im1 and Ts2 (Fig. 7).

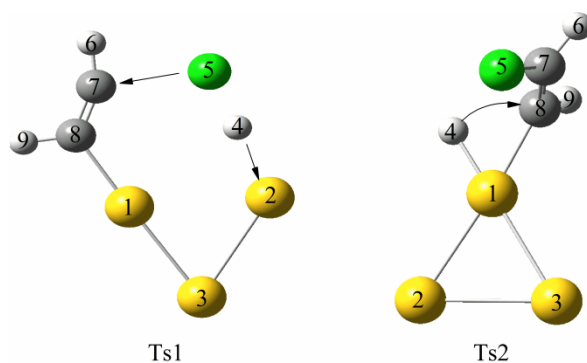

Fig. S6. The geometries of transition states (Ts) in the Au<sub>3</sub> cluster catalyzed reaction pathway. Au, Cl, C and H atoms are depicted in yellow, green, gray and white respectively.

Table S4. The mulliken partial charges (au) of Au cluster, C<sub>2</sub>H<sub>2</sub> and HCl in different adsorbed complexes.

| Components                    | Au <sub>n</sub> -C <sub>2</sub> H <sub>2</sub> (au) |                 |                 |                 |                 |                 |                 |                  | Au <sub>n</sub> -HCl (au) |                 |                 |                 |                 |                 |                 |                  |
|-------------------------------|-----------------------------------------------------|-----------------|-----------------|-----------------|-----------------|-----------------|-----------------|------------------|---------------------------|-----------------|-----------------|-----------------|-----------------|-----------------|-----------------|------------------|
|                               | Au <sub>3</sub>                                     | Au <sub>4</sub> | Au <sub>5</sub> | Au <sub>6</sub> | Au <sub>7</sub> | Au <sub>8</sub> | Au <sub>9</sub> | Au <sub>10</sub> | Au <sub>3</sub>           | Au <sub>4</sub> | Au <sub>5</sub> | Au <sub>6</sub> | Au <sub>7</sub> | Au <sub>8</sub> | Au <sub>9</sub> | Au <sub>10</sub> |
| Au cluster                    | -0.446                                              | -0.466          | -0.492          | -0.431          | -0.481          | -0.453          | -0.466          | -0.495           | -0.313                    | -0.362          | -0.241          | -0.219          | -0.248          | -0.248          | -0.245          | -0.213           |
| C <sub>2</sub> H <sub>2</sub> | 0.446                                               | 0.466           | 0.492           | 0.431           | 0.481           | 0.453           | 0.466           | 0.495            | —                         | —               | —               | —               | —               | —               | —               | —                |
| HCl                           | —                                                   | —               | —               | —               | —               | —               | —               | —                | 0.313                     | 0.362           | 0.241           | 0.219           | 0.248           | 0.248           | 0.245           | 0.213            |

Table S5. The bond length (Å) of transition states (Ts) involved in the Au<sub>3</sub> cluster catalyzed reaction pathway.

| Atom-Bond | 1-8   | 4-5   | 7-8   | 5-7   | 4-8   |
|-----------|-------|-------|-------|-------|-------|
| Ts1       | 2.070 | 1.493 | 1.272 | 2.364 | 3.331 |
| Ts2       | 2.067 | 3.240 | 1.334 | 1.741 | 1.805 |

## References and Notes

- 1 H. Hakkinen and U. Landman, *Phys. Rev. B*, 2000, **62**, 2287-2290.
- 2 V. Bonacic-Koutecky, J. Burda, R. Mitric, M. Ge, G. Zampella and P. Fantucci, *J. Chem. Phys.*, 2002, **117**, 3120-3131.
- 3 J. Wang, G. Wang and J. Zhao, *Phys. Rev. B*, 2002, **66**, 035418-035424.
- 4 L. Xiao and L. Wang, *Chem. Phys. Lett.*, 2004, **392**, 452–455.
- 5 F. Furche, R. Ahlrichs, P. Weis, C. Jacob, S. Gilb, T. Bierweiler and M. M. Kappes, *J. Chem. Phys.*, 2002, **117**, 6982-6990.
- 6 X. Chen, S. Sun, F. Li , X. Wang and D. Xia, *Molecules*, 2013, **18**, 3279-3291.
